# Supplementary figures and images for: Vulvar Reconstruction with Freestyle Perforator Flap from the Medial Thigh Using Color Doppler Ultrasound
Source: PubMed Central journal article supplement — Plast Reconstr Surg Glob Open. 2024 Oct 9;12(10):e6236. doi: 10.1097/GOX.0000000000006236 (PMC11463205; doi:10.1097/gox.0000000000006236), 2024-10-09

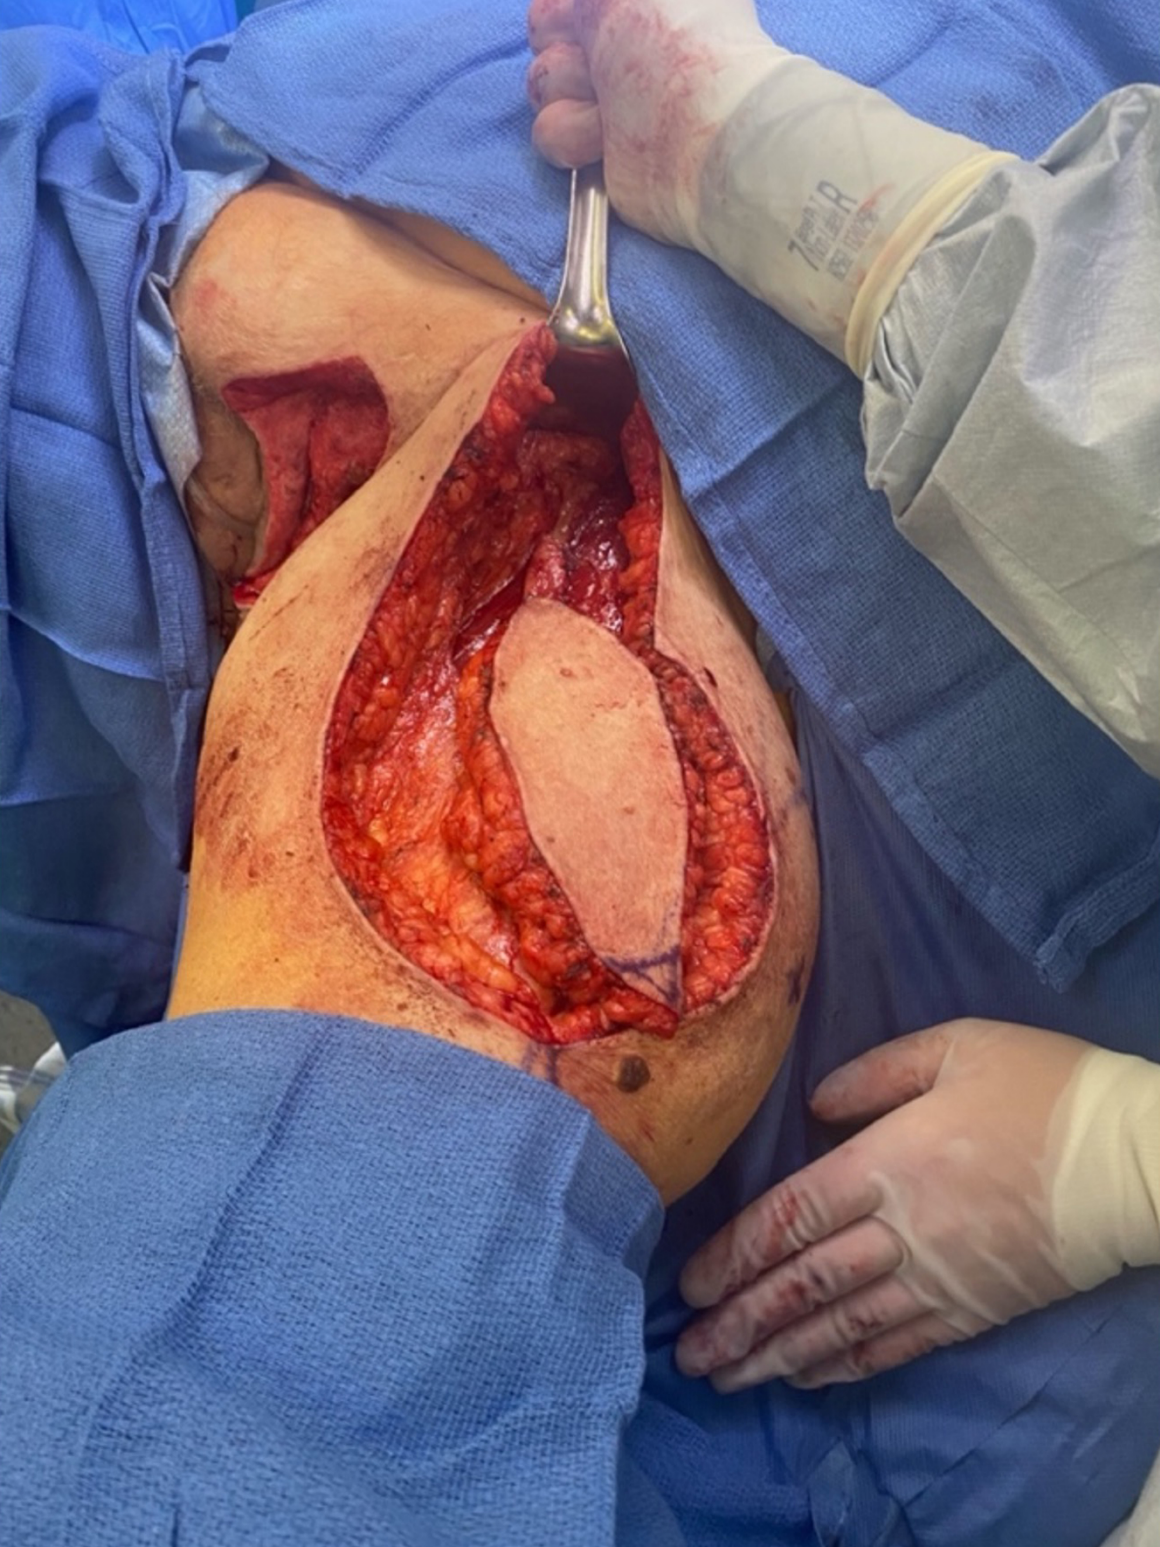

Supplement: gox-12-e6236-s001.pdf [file gox-12-e6236-s001.pdf]

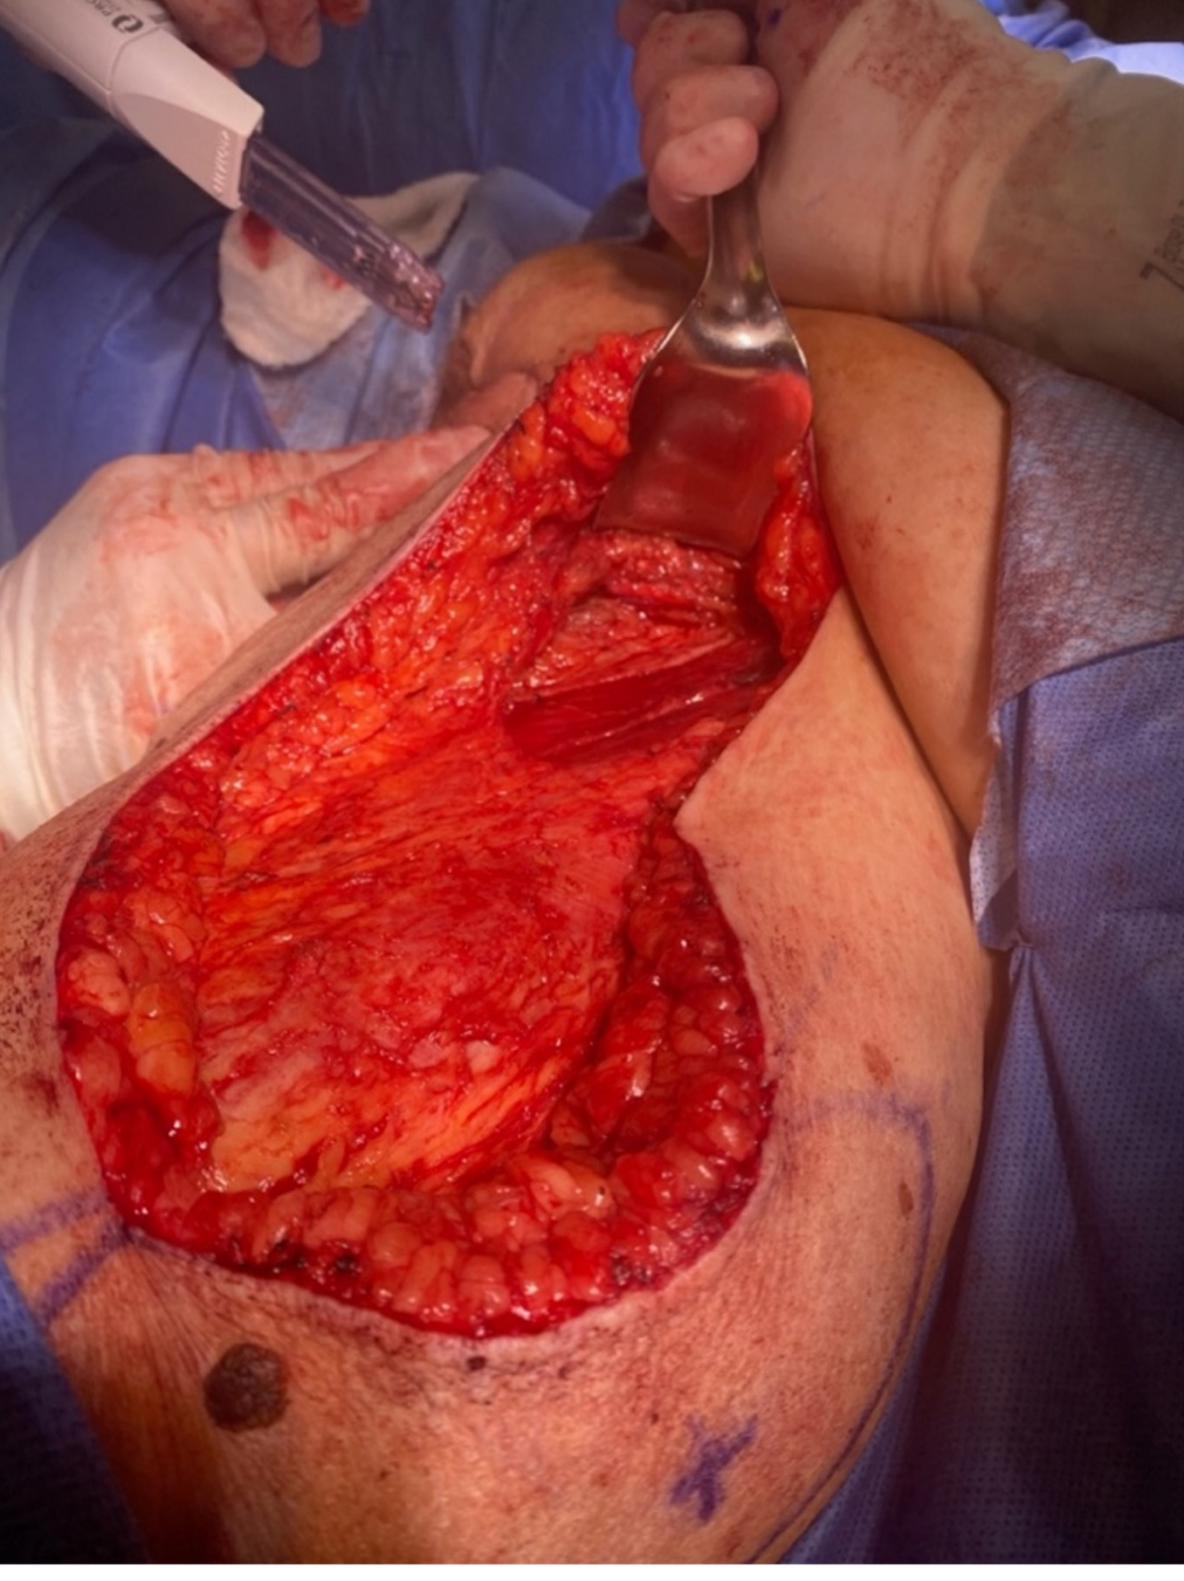

Supplement: gox-12-e6236-s002.pdf [file gox-12-e6236-s002.pdf]
